# Supplementary material for: Assessing the Impact of COVID-19 Prevention Measures on Adolescent Growth in Italy
Source: MDPI journal article supplement (doi:10.3390/healthcare11142101), 2023-07-24
Supplement: s1 [file s1]

## SUPPLEMENTARY MATERIAL

### Assessing the impact of COVID-19 prevention measures on adolescent growth in Italy

Luciana Zaccagni, Natascia Rinaldo, Gianni Mazzoni, Simona Mandini, Sabrina Masotti, Stefania Toselli, Federica De Luca, and Emanuela Gualdi-Russo

**Table S1.** Basic socio-demographic information collected during the survey.

|    | List of questions                                                 |
|----|-------------------------------------------------------------------|
| 1. | Survey date                                                       |
| 2. | School section                                                    |
| 3. | Name                                                              |
| 4. | Surname                                                           |
| 5. | Gender    F <input type="checkbox"/> ; M <input type="checkbox"/> |
| 6. | Date of birth (month/day/year)                                    |
| 7. | Place of birth                                                    |

**Table S2.** Instructions to assess the Body image perception using the scale of silhouettes developed by Childress et al. [33].

| Instructions |                                                                                                         |
|--------------|---------------------------------------------------------------------------------------------------------|
| 1.           | Among the eight silhouettes on the scale, circle the one that most closely resembles you.               |
| 2.           | Among the same eight silhouettes, underline the number of the one with the look you would like to have. |
